# Supplementary material for: A two-step etching route to ultrathin carbon nanosheets for high performance electrical double layer capacitors
Source: Royal Society of Chemistry journal article supplement (doi:10.1039/c6nr02155g), 2016-01-01
Supplement: c6nr02155g1.pdf [file c6nr02155g1.pdf]

## Supporting Information

### A Two-Step Etching Route to Ultrathin Carbon Nanosheets for High Performance Electrical Double Layer Capacitors

Bing Ding,<sup>a</sup> Jie Wang,<sup>a</sup> Ya Wang,<sup>a</sup> Zhi Chang,<sup>a</sup> Gang Pang,<sup>a</sup> Hui Dou,<sup>\*a</sup> and Xiaogang Zhang<sup>\*a</sup>

<sup>a</sup>Jiangsu Key Laboratory of Materials and Technology for Energy Conversion, College of Material Science and Engineering, Nanjing University of Aeronautics and Astronautics, Nanjing, 210016, P. R. China

\*Corresponding authors: E-mail: dh\_msc@nuaa.edu.cn (H. Dou); azhangxg@nuaa.edu.cn (X. G. Zhang)

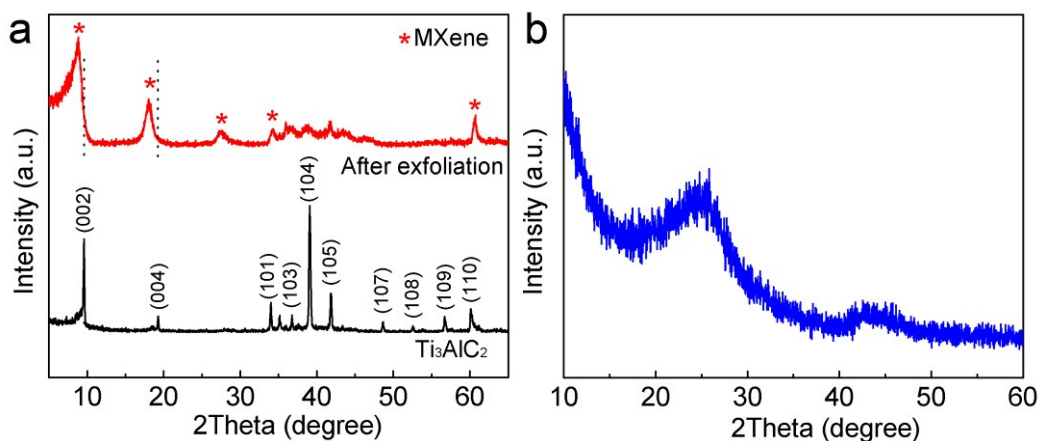

**Fig. S1** XRD patterns of (a)  $\text{Ti}_3\text{AlC}_2$  and MXene and (b) MDC-900.

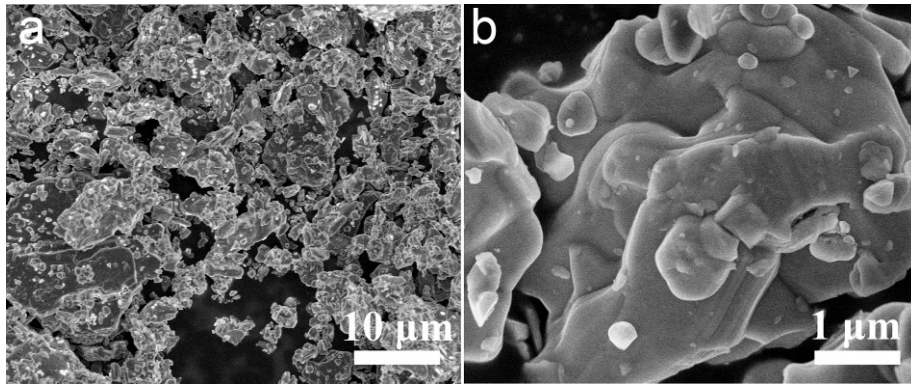

**Fig. S2** SEM images of  $\text{Ti}_3\text{AlC}_2$ .

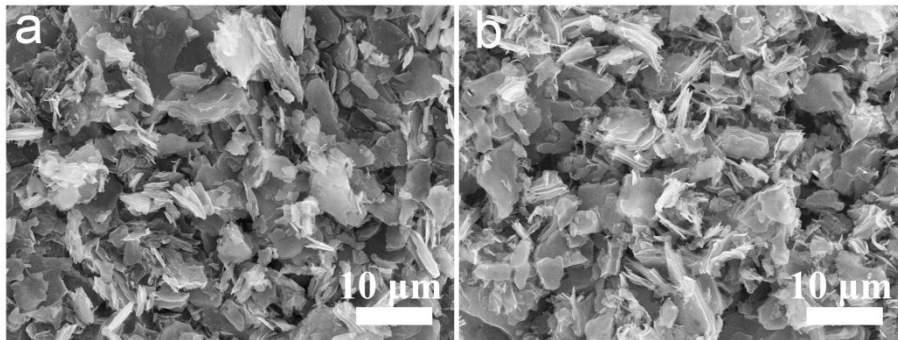

**Fig. S3** SEM images of (a) MDC-700 and (b) MDC-900.

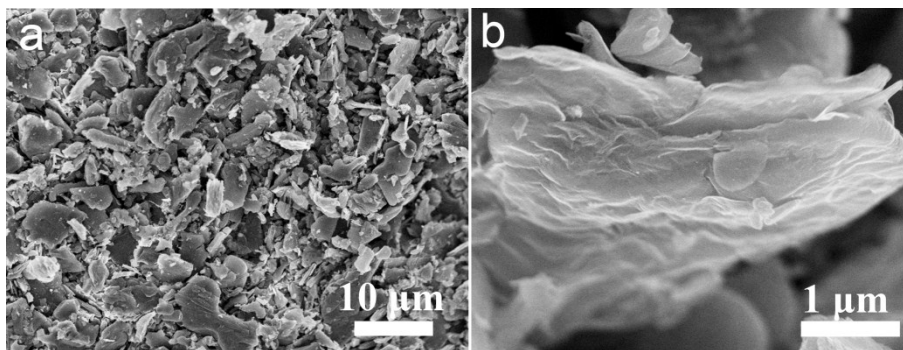

**Fig. S4** (a. b) SEM images of CDC-900.

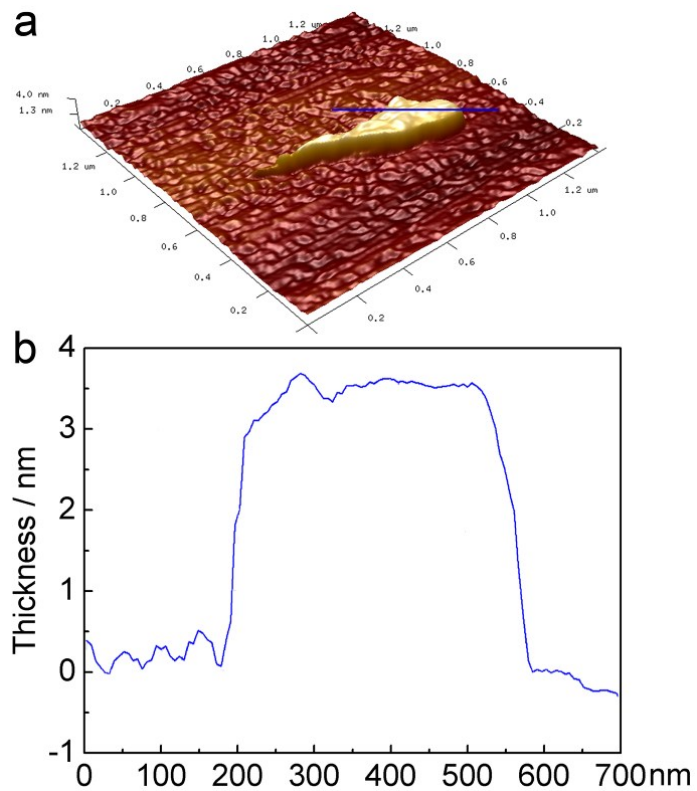

**Fig. S5** (a) AFM image of MDC-900 and (b) thickness profile.

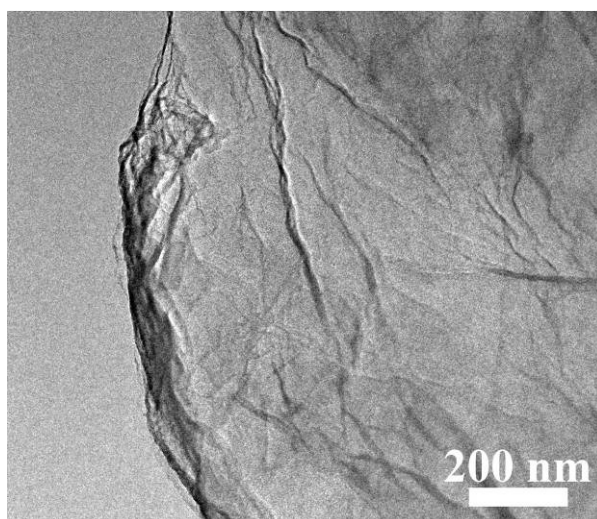

**Fig. S6** TEM image of CDC-900.

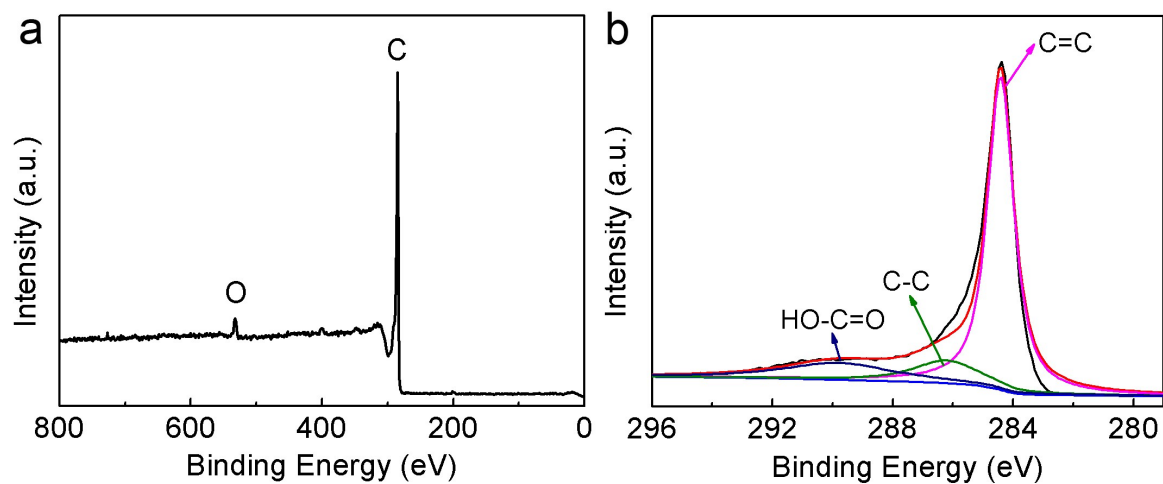

**Fig. S7** (a) XPS and (b) high resolution C 1s XPS spectra of MDC-900.

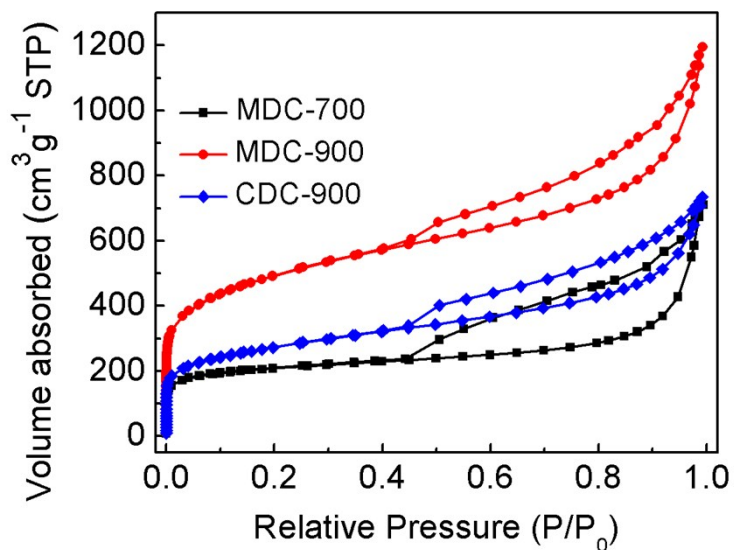

**Fig. S8** N<sub>2</sub> sorption isotherms of MDC-700, MDC-900, and CDC-900.

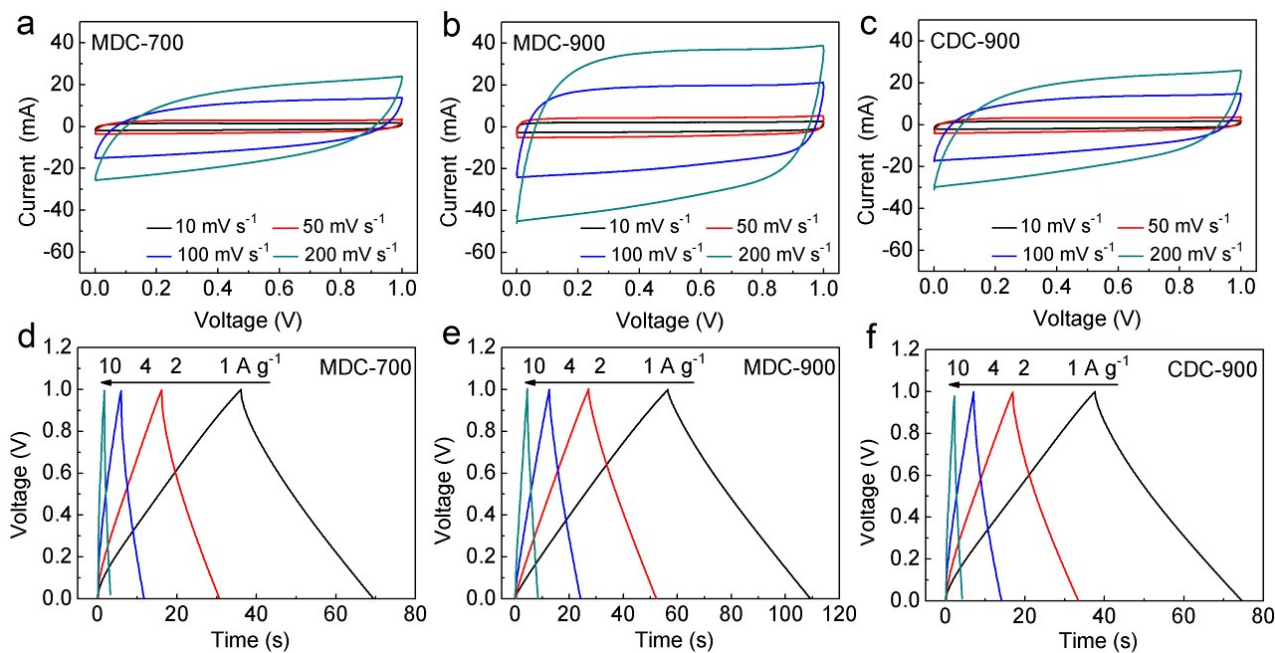

**Fig. S9** (a-c) CV curves and (d-f) galvanostatic charge/discharge curves of MDC-700, MDC-900, and CDC-900.

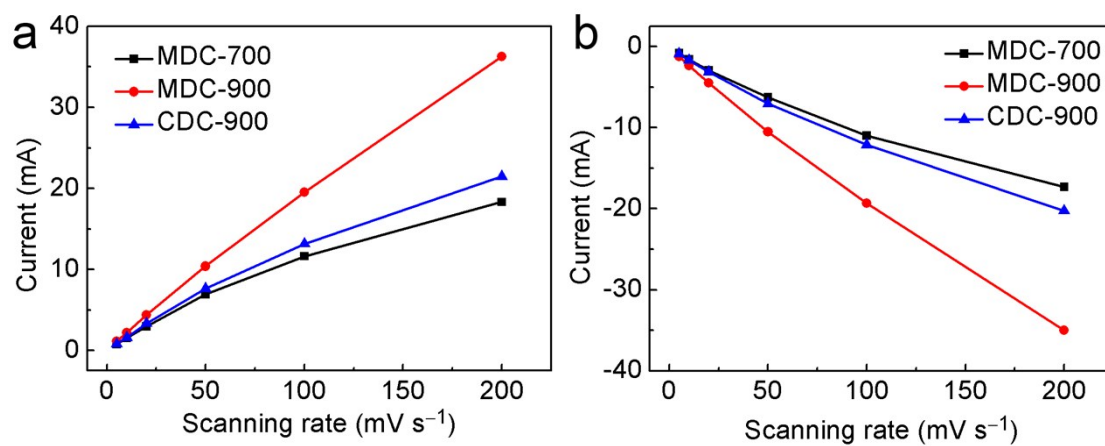

**Fig. S10** Evolution of the (a) charge current and (b) discharge current versus scan rate of MDC-700, MDC-900, and CDC-900.

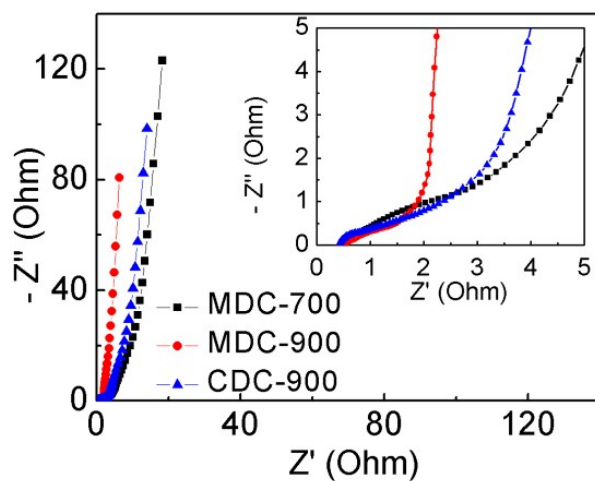

**Fig. S11** Nyquist plots of MDC-700, MDC-900, and CDC-900. The inset shows the magnified high-frequency regions.

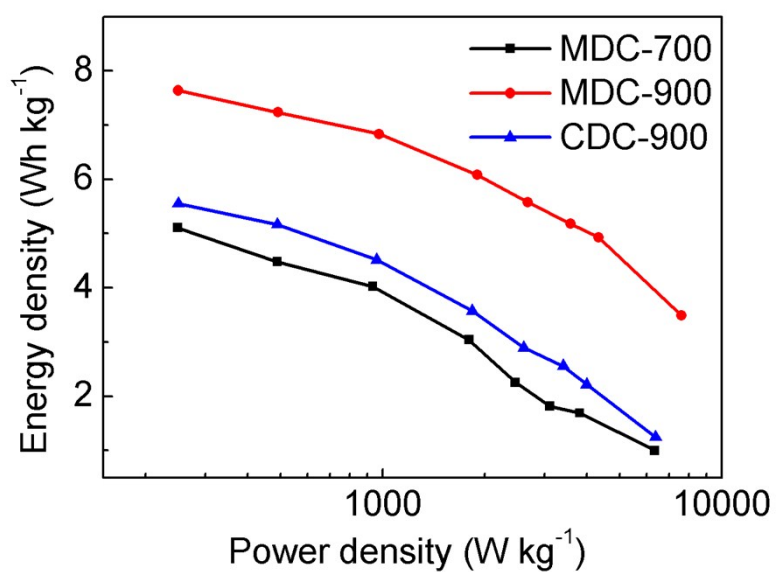

**Fig. S12** Ragone plots of MDC-700, MDC-900, and CDC-900.

**Table S1** Summaries of the porosity properties and specific capacitances of MDC-700, MDC-900 and CDC-900.

| Samples | $S_{\text{BET}}$<br>( $\text{m}^2 \text{g}^{-1}$ ) | $S_{\text{Micro}}$<br>( $\text{m}^2 \text{g}^{-1}$ ) <sup>a</sup> | $S_{\text{Meso}}$<br>( $\text{m}^2 \text{g}^{-1}$ ) <sup>b</sup> | Volume<br>( $\text{cm}^3 \text{g}^{-1}$ ) | Capacitance<br>( $\text{F g}^{-1}$ ) <sup>c</sup> | Retention <sup>d</sup> |
|---------|----------------------------------------------------|-------------------------------------------------------------------|------------------------------------------------------------------|-------------------------------------------|---------------------------------------------------|------------------------|
| MDC-700 | 773                                                | 462                                                               | 311                                                              | 0.68                                      | 142                                               | 51%                    |
| MDC-900 | 1766                                               | 573                                                               | 1193                                                             | 1.45                                      | 220                                               | 79%                    |
| CDC-900 | 910                                                | 558                                                               | 352                                                              | 0.88                                      | 160                                               | 55%                    |

(a) SSA of micropores, (b) SSA of mesopores; (c) Specific capacitance at 0.5 A  $\text{g}^{-1}$ ; (d) Capacitance retention at 20 A  $\text{g}^{-1}$ .
